# Supplementary material for: Transcranial direct current stimulation and working memory: Comparison of effect on learning shapes and English letters
Source: PLoS One. 2020 Jul 24;15(7):e0222688. doi: 10.1371/journal.pone.0222688 (PMC7380606; doi:10.1371/journal.pone.0222688)
Supplement: S1 Data — (XLSX) [file pone.0222688.s001.xlsx]

## Sheet: Shapes
Accuracy	Stimulation
77.7778	SHAM
70.2703	SHAM
78.3784	SHAM
82.8571	SHAM
54.2857	SHAM
81.0811	SHAM
75.6757	SHAM
34.2857	SHAM
59.4595	SHAM
97.1429	SHAM
56.7568	SHAM
64.8649	SHAM
81.0811	SHAM
75.6757	SHAM
62.8571	SHAM
83.7838	SHAM
81.0811	SHAM
77.1429	SHAM
74.2857	SHAM
62.8571	SHAM
96.7742	tDCS
77.1429	tDCS
68.5714	tDCS
83.7838	tDCS
70.2703	tDCS
91.4286	tDCS
80	tDCS
51.3514	tDCS
65.7143	tDCS
91.8919	tDCS
88.5714	tDCS
71.4286	tDCS
88.5714	tDCS
80	tDCS
70.2703	tDCS
77.1429	tDCS
85.7143	tDCS
72.973	tDCS
70.2703	tDCS
75.6757	tDCS

## Sheet: Letters
Accuracy	Stimulation
100	SHAM
70.2703	SHAM
67.5676	SHAM
85.7143	SHAM
82.8571	SHAM
83.7838	SHAM
81.0811	SHAM
60	SHAM
64.8649	SHAM
94.2857	SHAM
62.1622	SHAM
64.8649	SHAM
70.2703	SHAM
97.2973	SHAM
74.2857	SHAM
86.4865	SHAM
91.8919	SHAM
85.7143	SHAM
71.4286	SHAM
85.7143	SHAM
94.5946	tDCS
88.5714	tDCS
88.5714	tDCS
91.8919	tDCS
72.973	tDCS
94.2857	tDCS
94.2857	tDCS
59.4595	tDCS
65.7143	tDCS
97.2973	tDCS
94.2857	tDCS
77.1429	tDCS
88.5714	tDCS
97.1429	tDCS
64.8649	tDCS
88.5714	tDCS
97.1429	tDCS
75.6757	tDCS
56.7568	tDCS
75.6757	tDCS
